# Supplementary material for: Effect of adaptive cruise control on fuel consumption in real-world driving conditions
Source: PubMed Central journal article supplement (PMC11577072; doi:10.1038/s41467-024-54066-8), 2024-11-19
Supplement: 41467_2024_54066_MOESM1_ESM.pdf [file 41467_2024_54066_MOESM1_ESM.pdf]

# Supplementary Information: Effect of Adaptive Cruise Control on Fuel Consumption in Real-World Driving Conditions

Ayman Moawad<sup>1,\*</sup>, Matthew Zebiak<sup>2</sup>, Jihun Han<sup>1</sup>, Dominik Karbowski<sup>1</sup>, Yaozhong Zhang<sup>1</sup>, Aymeric Rousseau<sup>1</sup>

<sup>1</sup>A. Moawad, J. Han, D. Karbowski, Y. Zhang, and A. Rousseau are with the Vehicle and Mobility Simulation department at Argonne National Laboratory, 9700 S Cass Ave, Lemont, IL 60439 USA.

<sup>2</sup>M. Zebiak is a Senior Consultant at 2050 Partners, 81 Coral Drive, Orinda, CA 94563.

\*Corresponding author: Ayman Moawad (E-mail: amoawad@anl.gov)

Supplementary Table 1: Linear mixed effect model estimates of the effect of ACC engagement and other covariates on fuel consumption over various situation modes with preceding vehicle (PV) differentiation. The main numbers represent the estimated effects evaluated using t-tests based on Satterthwaite's method; numbers in parentheses represent the standard errors, and reported p-values are two-sided based.

|                                                                        | <i>Dependent variable</i> |                      |                      |                      |                      |                      |
|------------------------------------------------------------------------|---------------------------|----------------------|----------------------|----------------------|----------------------|----------------------|
|                                                                        | FuelCons                  |                      |                      |                      |                      |                      |
|                                                                        | (1)<br>CrsPV              | (2)<br>BSnAPV        | (3)<br>BnAPV         | (4)<br>APV           | (5)<br>BPV           | (6)<br>CrpPV         |
| Inverse Avg Speed (km/h) <sup>-1</sup><br>(veh_spd_meanI)              | 5.287***<br>(0.278)       | 2.869***<br>(0.181)  | 2.180***<br>(0.325)  | 4.408***<br>(0.258)  | 3.348***<br>(0.212)  | 2.800***<br>(0.197)  |
| ACC Engagement<br>(ACC_engaged_cat)                                    | 0.500***<br>(0.054)       | 0.498*<br>(0.276)    | 0.575***<br>(0.092)  | 0.431<br>(0.268)     | 0.190<br>(0.119)     | -1.066<br>(2.033)    |
| Vehicle Present Ahead<br>(veh_ahead_cat)                               | -0.443***<br>(0.025)      | -0.617***<br>(0.097) | -0.505***<br>(0.036) | -0.609***<br>(0.114) | -0.723***<br>(0.051) | -0.228<br>(1.833)    |
| Inverse Trip Distance (1/km)<br>(dist_covered_kml)                     | 0.310***<br>(0.006)       | 3.058***<br>(0.026)  | 2.500***<br>(0.014)  | 2.732***<br>(0.031)  | -0.205***<br>(0.014) | 0.855***<br>(0.254)  |
| Starting Vehicle Speed (km/h)<br>(veh_spd_start)                       | -0.123***<br>(0.003)      | -0.143***<br>(0.002) | -0.124***<br>(0.001) | 0.472***<br>(0.076)  | -1.500***<br>(0.105) | -0.049<br>(0.090)    |
| Ending Vehicle Speed (km/h)<br>(veh_spd_end)                           | 0.150***<br>(0.003)       | 0.260***<br>(0.003)  | 0.236***<br>(0.001)  | -1.590***<br>(0.159) | 0.593***<br>(0.027)  | 0.168**<br>(0.085)   |
| Min Vehicle Speed (km/h)<br>(veh_spd_min)                              | -0.077***<br>(0.003)      | -0.164<br>(0.404)    | -0.117***<br>(0.001) | -0.687***<br>(0.076) | -0.570***<br>(0.027) |                      |
| Max Vehicle Speed (km/h)<br>(veh_spd_max)                              | 0.135***<br>(0.003)       | 0.149***<br>(0.004)  | 0.099***<br>(0.002)  | 1.988***<br>(0.159)  | 1.480***<br>(0.105)  | -0.089<br>(0.157)    |
| Trip Elevation Change<br>(elev_delta)                                  | 0.033***<br>(0.0004)      | 0.296***<br>(0.006)  | 0.236***<br>(0.002)  | 0.383***<br>(0.007)  | 0.267***<br>(0.004)  | 0.363*<br>(0.188)    |
| Avg. Ambient Temperature<br>(amb_temp)                                 | 0.011***<br>(0.001)       | 0.152***<br>(0.005)  | 0.050***<br>(0.002)  | 0.073***<br>(0.006)  | 0.030***<br>(0.003)  | 0.565***<br>(0.068)  |
| Avg. Engine Temperature<br>(eng_temp)                                  | -0.044***<br>(0.001)      | -0.109***<br>(0.002) | -0.077***<br>(0.001) | -0.108***<br>(0.003) | -0.022***<br>(0.002) | -0.362***<br>(0.047) |
| Vehicle Ahead While ACC Engaged<br>(ACC_engaged_catTRUE:veh_ahead_cat) | -0.516***<br>(0.059)      | -1.077***<br>(0.290) | -1.005***<br>(0.100) | -1.294***<br>(0.295) | 0.228*<br>(0.128)    |                      |
| Constant                                                               | -0.094<br>(0.212)         | -5.334***<br>(0.681) | 0.390<br>(0.402)     | -7.488***<br>(0.710) | 4.028***<br>(0.270)  | 27.731***<br>(6.050) |
| Observations                                                           | 92,434                    | 38,580               | 81,661               | 13,033               | 26,992               | 351                  |
| Log Likelihood                                                         | -235,737.600              | -126,204.500         | -234,452.200         | -40,045.500          | -71,789.090          | -1,347.710           |
| Akaike Inf. Crit.                                                      | 471,511.300               | 252,445.100          | 468,940.400          | 80,127.000           | 143,614.200          | 2,727.421            |
| Bayesian Inf. Crit.                                                    | 471,681.100               | 252,599.200          | 469,108.000          | 80,261.550           | 143,761.800          | 2,789.194            |

Note:

\*p<0.1; \*\*p<0.05; \*\*\*p<0.01

Supplementary Table 2: Vehicles in the fleet. Unique make/model/series/trim combinations are distributed over multiple drivers and VINs, bringing the fleet to 157 vehicles on the road. Engine characteristics are as follows. LSY: 2.0T I4 Gas, L3B: 2.7T I4 Gas, LGY: 3.0TT V6 Gas, L84: 5.3L V8 Gas, L87: 6.2L V8 Gas, LT4: 6.2L Supercharged V8 Gas, LM2: 3.0T I6 Diesel, LZ0: 3.0T I6 Diesel.

| Model Year | Make      | Model        | Series                  | Engine Model |
|------------|-----------|--------------|-------------------------|--------------|
| 2020       | CADILLAC  | CT5          | Null                    | LSY          |
| 2021       | CADILLAC  | CT4          | V-Series                | L3B          |
|            |           | CT5          | Premium Luxury          | LGY          |
|            |           |              | V-Series                | LGY          |
|            |           | Escalade     | Premium Luxury          | L87          |
|            |           |              | Premium Luxury Platinum | L87          |
|            |           |              |                         | LM2          |
|            |           |              | Sport                   | L87          |
|            |           |              |                         | LM2          |
|            |           |              | Sport Platinum          | L87          |
|            |           |              |                         | LM2          |
|            |           | Escalade ESV | Premium Luxury          | L87          |
|            |           |              | Premium Luxury Platinum | L87          |
|            |           |              |                         | LM2          |
|            |           |              | Sport                   | L87          |
|            |           |              | Sport Platinum          | L87          |
|            | CHEVROLET | Suburban     | High Country            | L87          |
|            |           | Tahoe        | LS                      | L84          |
|            | GMC       | Yukon        | SLT                     | L84          |
|            |           | Yukon XL     | XL SLT                  | L84          |
| 2022       | CADILLAC  | CT4          | Premium Luxury          | L3B          |
|            |           |              |                         | LSY          |
|            |           |              | Sport                   | LSY          |
|            |           |              | V-Series                | L3B          |
|            |           | CT5          | Premium Luxury          | LGY          |
|            |           |              |                         | LSY          |
|            |           |              | Sport                   | LSY          |
|            |           |              | V-Series                | LGY          |
|            |           | Escalade     | Premium Luxury          | L87          |
|            |           |              | Premium Luxury Platinum | L87          |
|            |           |              | Sport                   | L87          |
|            |           |              |                         | LM2          |
|            |           |              | Sport Platinum          | L87          |
|            |           | Escalade ESV | Premium Luxury          | L87          |
|            |           |              |                         | LM2          |
|            |           |              | Premium Luxury Platinum | L87          |
|            |           |              |                         | LM2          |
|            |           |              | Sport                   | LM2          |
|            |           |              | Sport Platinum          | L87          |
|            |           |              |                         | LM2          |
|            | CHEVROLET | Silverado    | 1500                    | L84          |
|            |           |              |                         | L87          |
|            |           |              |                         | LM2          |
|            |           | Tahoe        | High Country            | L87          |
|            | GMC       | HUMMER       | 3X EDITION 1            | Null         |
|            |           | Sierra       | 1500                    | L84          |
|            |           |              |                         | L87          |
|            |           |              |                         | LM2          |
|            |           | Yukon        | AT4                     | L84          |
| 2023       | CADILLAC  | Escalade     | V-Sport                 | LT4          |
|            |           | Escalade ESV | V-Sport                 | LT4          |
|            | CHEVROLET | Silverado    | 1500                    | LZ0          |
|            | GMC       | Sierra       | 1500                    | LZ0          |
